# Supplementary material for: Crystal Facet Regulation and Ru Incorporation of Co3O4 for Acidic Oxygen Evolution Reaction Electrocatalysis
Source: PubMed Central journal article supplement — ACS Nanosci Au. 2024 Sep 12;4(6):409–15. doi: 10.1021/acsnanoscienceau.4c00037 (PMC11659885; doi:10.1021/acsnanoscienceau.4c00037), 2024-09-12
Supplement: ng4c00037_si_001.pdf [file ng4c00037_si_001.pdf]

**Supporting Information**  
*for*

# Crystal Facet Regulation and Ru Incorporation of Co<sub>3</sub>O<sub>4</sub> for Acidic Oxygen Evolution Reaction Electrocatalysis

*Mengting Zhao, Hanfeng Liang\**

State Key Laboratory of Physical Chemistry of Solid Surfaces, College of Chemistry  
and Chemical Engineering, Xiamen University, Xiamen 361005, China

\*Email: [hfliang@xmu.edu.cn](mailto:hfliang@xmu.edu.cn)

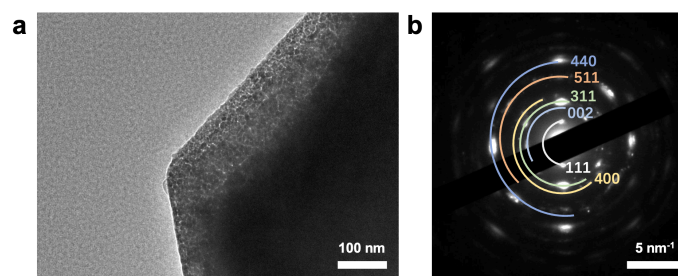

**Figure S1.** (a) TEM image and (b) SAED pattern of the *h*-Co<sub>3</sub>O<sub>4</sub>.

**Table S1.** Surface Co<sup>3+</sup>/Co<sup>2+</sup> ratio of the *c*-Co<sub>3</sub>O<sub>4</sub>, *o*-Co<sub>3</sub>O<sub>4</sub> and *h*-Co<sub>3</sub>O<sub>4</sub> based on XPS analysis.

| Catalyst                                 | Co <sup>3+</sup> (%) | Co <sup>2+</sup> (%) | Co <sup>3+</sup> /Co <sup>2+</sup> |
|------------------------------------------|----------------------|----------------------|------------------------------------|
| <i>c</i> -Co <sub>3</sub> O <sub>4</sub> | 55.01                | 44.99                | 1.22                               |
| <i>o</i> -Co <sub>3</sub> O <sub>4</sub> | 57.05                | 42.96                | 1.33                               |
| <i>h</i> -Co <sub>3</sub> O <sub>4</sub> | 59.56                | 40.54                | 1.47                               |

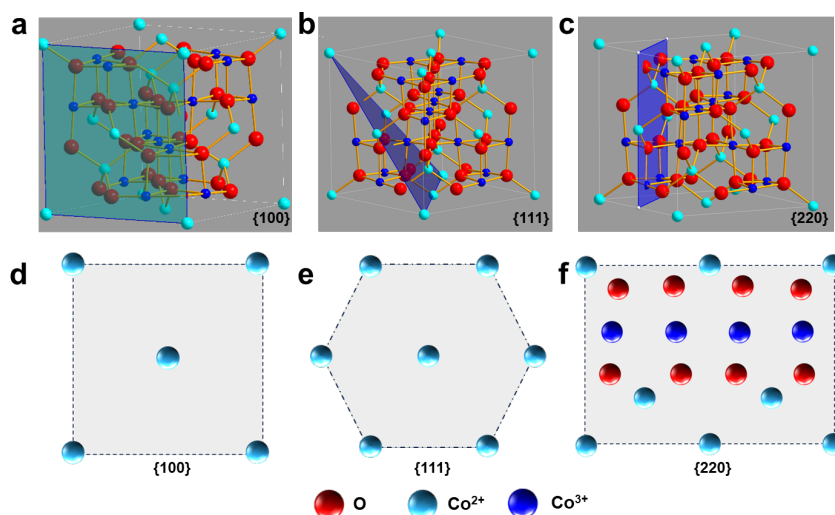

**Figure S2.** Atomic configuration of Co<sub>3</sub>O<sub>4</sub> (a) {100}, (b) {111} and (c) {220} crystal faces and (d-e) the corresponding crystal plane projections. The white spheres in S2c represent false atoms that pass through the crystal surface and do not actually exist.

**Table S2.**  $\text{Co}^{3+}/\text{Co}^{2+}$  ratio of the *c*- $\text{Co}_3\text{O}_4$ , *o*- $\text{Co}_3\text{O}_4$  and *h*- $\text{Co}_3\text{O}_4$  based on Raman analysis.

| Catalyst                           | $\text{Co}^{3+}/\text{Co}^{2+}$ |
|------------------------------------|---------------------------------|
| <i>c</i> - $\text{Co}_3\text{O}_4$ | 2.72                            |
| <i>o</i> - $\text{Co}_3\text{O}_4$ | 3.11                            |
| <i>h</i> - $\text{Co}_3\text{O}_4$ | 3.65                            |

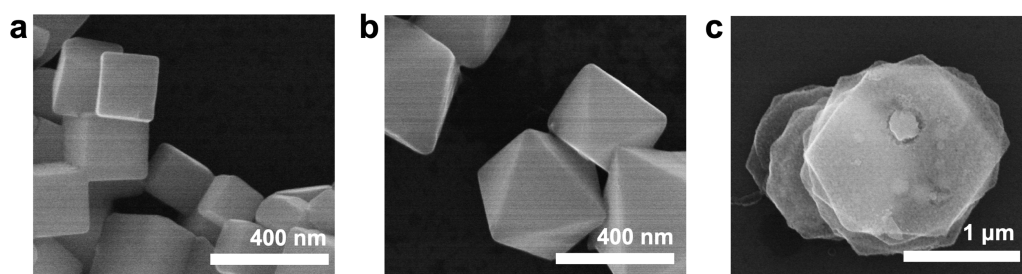

**Figure S3.** SEM images of the *c*- $\text{Co}_3\text{O}_4$ , *o*- $\text{Co}_3\text{O}_4$  and *h*- $\text{Co}_3\text{O}_4$  after the OER catalysis.

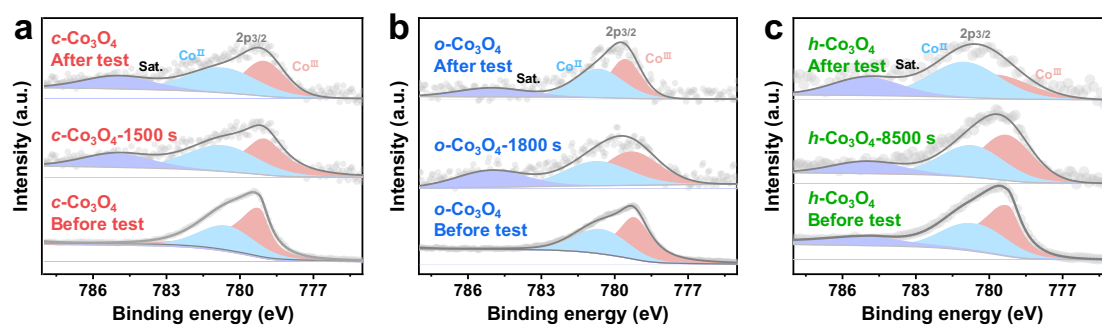

**Figure S4.** Co  $2p_{3/2}$  XPS spectra of (a) *c*- $\text{Co}_3\text{O}_4$  (b) *o*- $\text{Co}_3\text{O}_4$  and (c) *h*- $\text{Co}_3\text{O}_4$ .

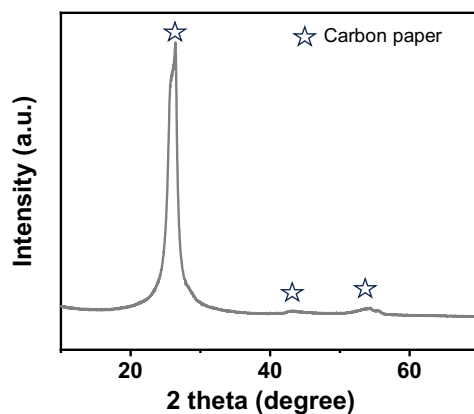

Figure S5. XRD pattern of carbon paper.

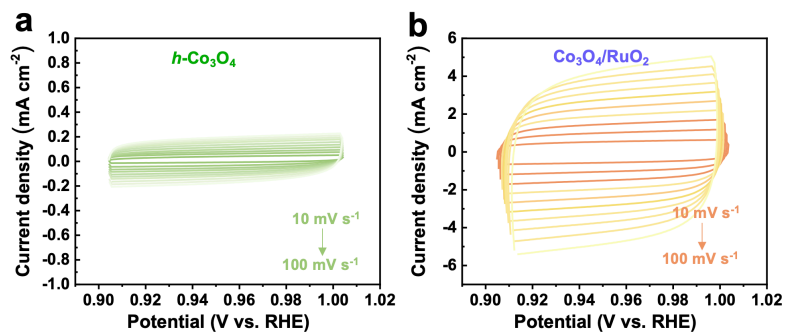

Figure S6. CV curves of (a)  $h\text{-Co}_3\text{O}_4$  and (b)  $\text{Co}_3\text{O}_4/\text{RuO}_2$  at different scanning rates.

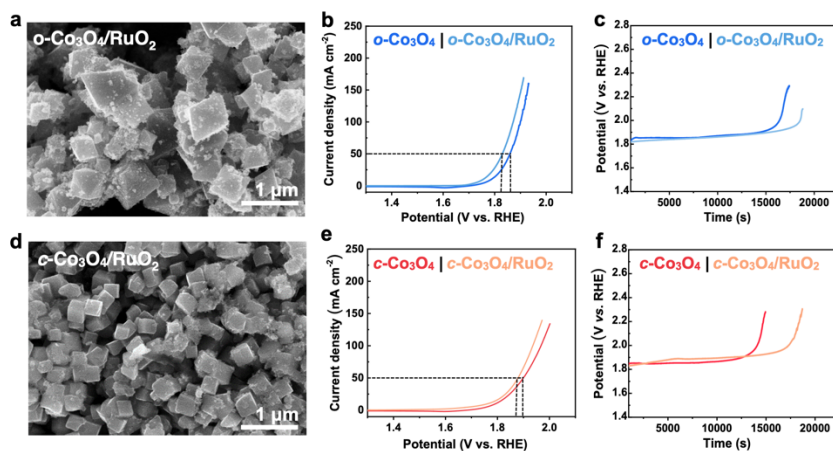

Figure S7. Structural and electrochemical characterization of (a-c)  $o\text{-Co}_3\text{O}_4$  and (b-d)  $c\text{-Co}_3\text{O}_4$ : (a, d) SEM images, (b, e) LSV curves, and (c, f) chronopotentiometry curves collected at  $10\text{ mA cm}^{-2}$ .

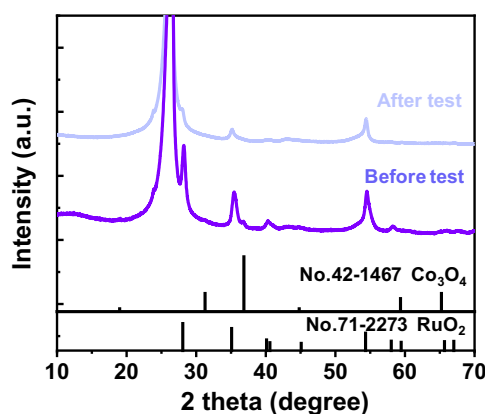

**Figure S8.** XRD patterns of  $\text{Co}_3\text{O}_4/\text{RuO}_2$  before and after test.

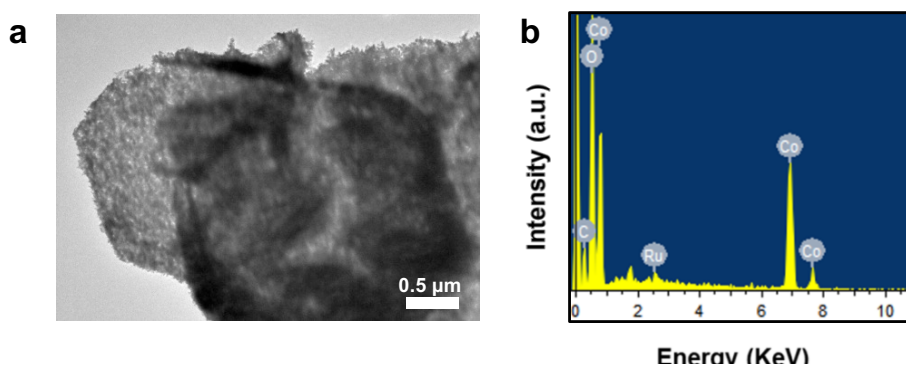

**Figure S9.** (a) TEM image and (b) EDS spectrum of the  $\text{Co}_3\text{O}_4/\text{RuO}_2$  after chronopotentiometry test.

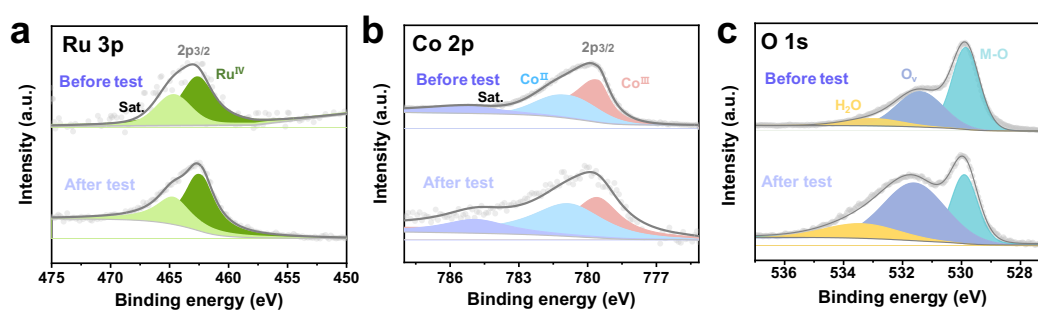

**Figure S10.** (a) Co 2p, (b) Ru 3p, and (c) O 1s XPS spectra of the  $\text{Co}_3\text{O}_4/\text{RuO}_2$  before and after the chronopotentiometry test.
